# Supplementary material for: Effect of Cross-Linking Cations on In Vitro Biocompatibility of Apple Pectin Gel Beads
Source: MDPI journal article supplement (doi:10.3390/ijms232314789), 2022-11-26

## Supplementary materials

**Figure S1.** Results of cytometric live (green) /dead (red) test in hPBMCs incubated with pectin gel beads.

(A) Control

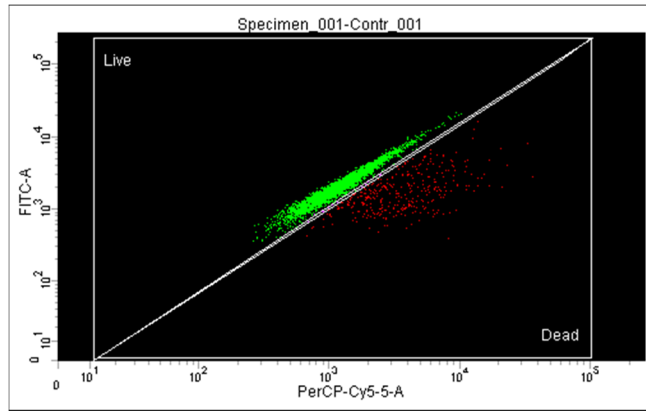

(B) CaPG beads

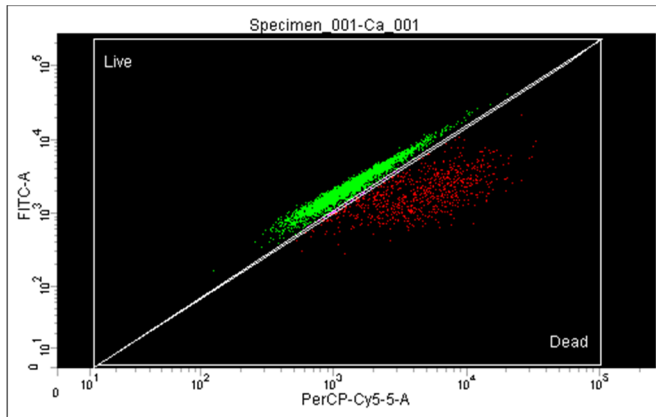

(C) ZnPG beads

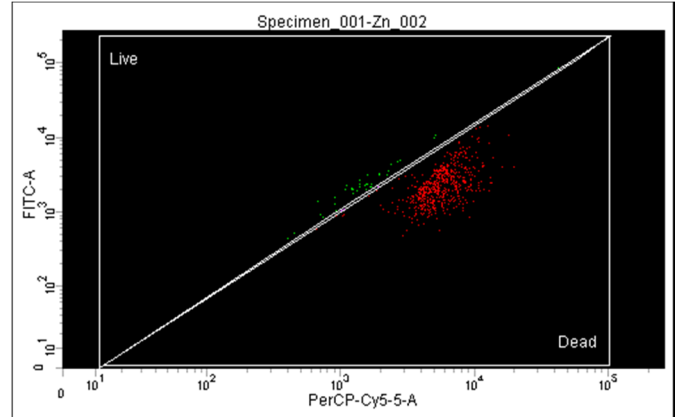

(D) FePG beads

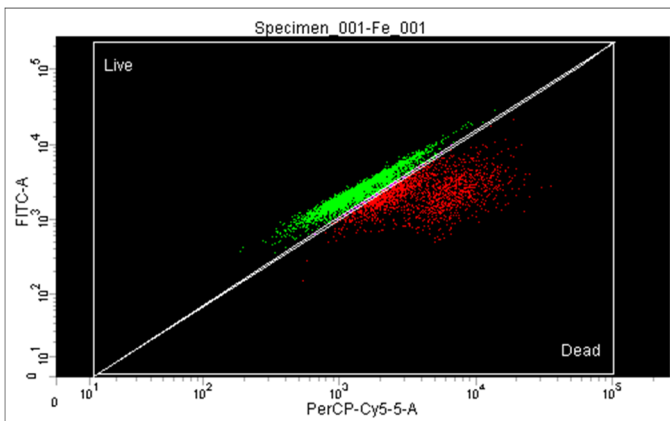

(E) AIPG beads

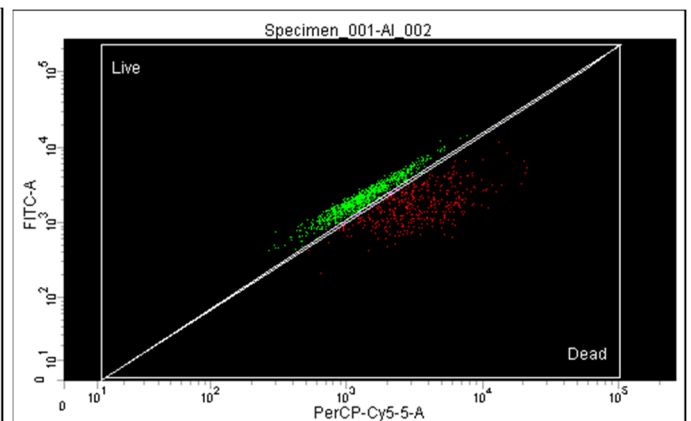

**Figure S2.** Monolayer of human fibroblasts incubated with pectin gel beads.

(A) Control

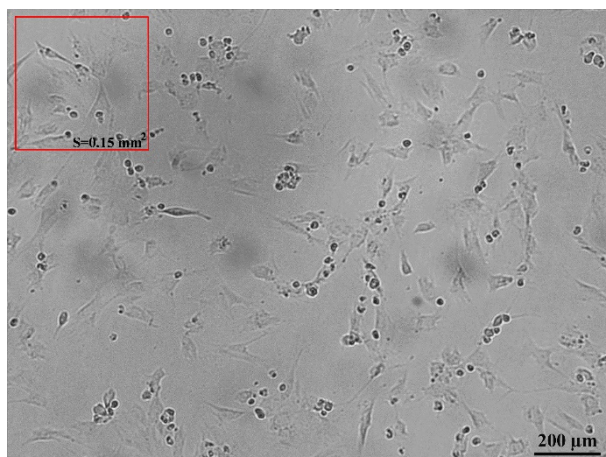

(B) CaPG beads

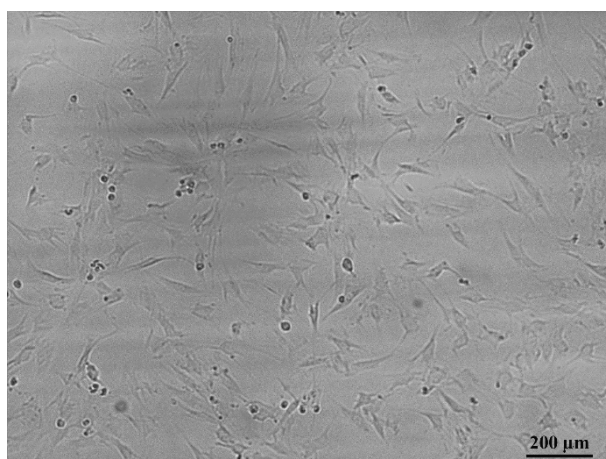

(C) ZnPG beads

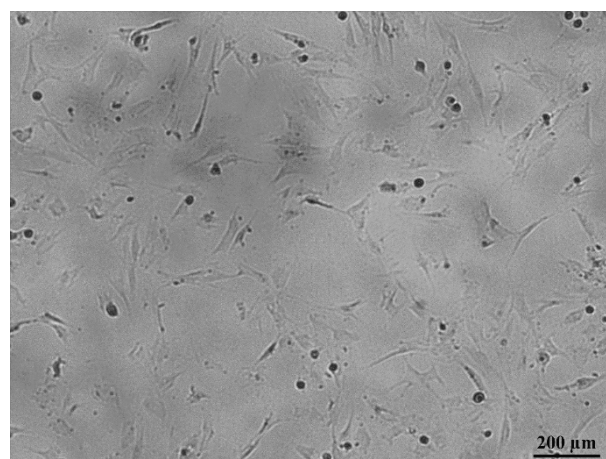

(D) FePG beads

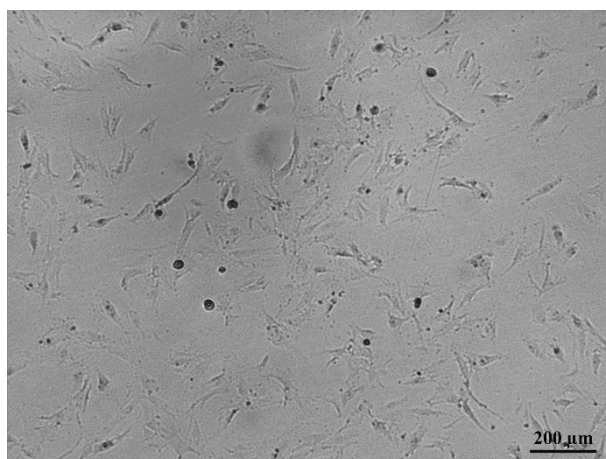

(E) AIPG beads

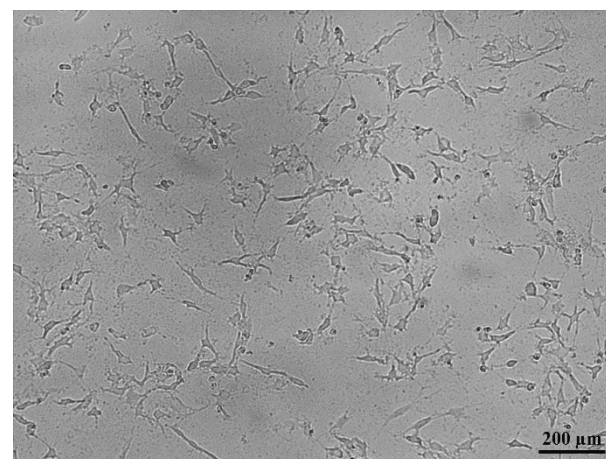

Supplement: s1 [file s1]
